# Supplementary material for: Biofunctionalization of selenium nanoparticles with a polysaccharide from Rosa roxburghii fruit and their protective effect against H2O2-induced apoptosis in INS-1 cells
Source: Royal Society of Chemistry journal article supplement (doi:10.1039/c8fo01958d), 2019-01-01
Supplement: c8fo01958d1.pdf [file c8fo01958d1.pdf]

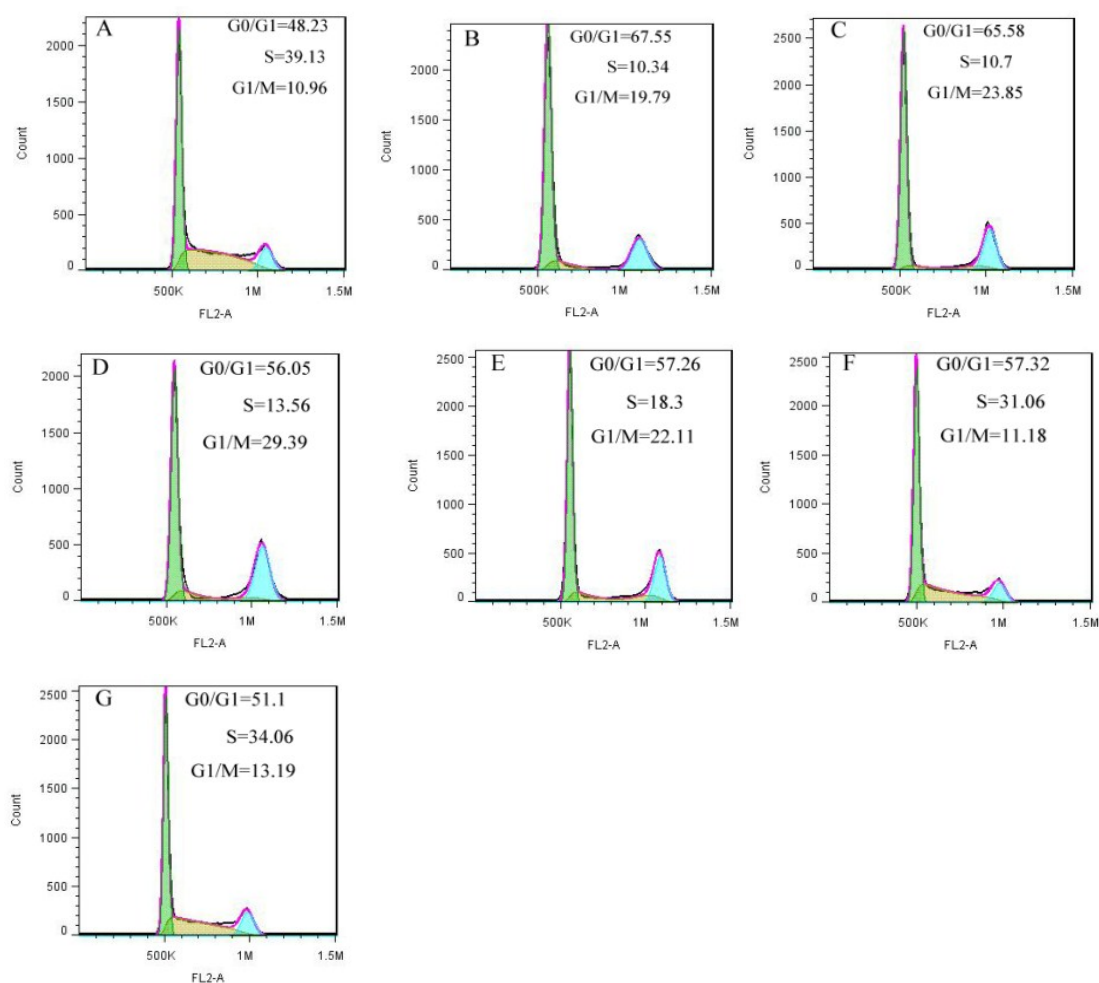

**Fig. S1** Different effects of RTFP-3, SeNPs, and RP3-SeNPs on the cell cycle induced by H<sub>2</sub>O<sub>2</sub> as examined by propidium iodide flow cytometric analysis: (A) Control; (B) H<sub>2</sub>O<sub>2</sub>; (C) H<sub>2</sub>O<sub>2</sub>+2 μg/mL RTFP-3; (D) H<sub>2</sub>O<sub>2</sub>+2 μg/mL SeNPs; (E) H<sub>2</sub>O<sub>2</sub>+0.5 μg/mL RP3-SeNPs; (F) H<sub>2</sub>O<sub>2</sub>+1 μg/mL RP3-SeNPs; (G) H<sub>2</sub>O<sub>2</sub>+2 μg/mL RP3-SeNPs.
